# Supplementary material for: Tergitol Based Decellularization Protocol Improves the Prerequisites for Pulmonary Xenografts: Characterization and Biocompatibility Assessment
Source: MDPI journal article supplement (doi:10.3390/polym15040819), 2023-02-06
Supplement: s1 [file s1]

| ANTIBODY                         | CAT. NUMBER | COMPANY                     | DILUTION      |
|----------------------------------|-------------|-----------------------------|---------------|
| Anti-Collagen I                  | C2456       | Sigma                       | Mouse, 1:100  |
| Anti-Collagen IV                 | AMab6586    | Abcam                       | Rabbit, 1:200 |
| Anti-Elastin                     | AB2161D     | Abcam                       | Rabbit, 1:50  |
| Anti-Laminin                     | L9393       | Sigma                       | Rabbit, 1:100 |
| Anti-Alpha-gal                   | LS-C63415   | LS Bio                      | 1:10          |
| DAPI                             | R37606      | ThermoFischer Scientific    | 10µg/ml       |
| Alexa Fluor 488<br>(anti-Rabbit) | A11008      | Invitrogen by ThermoFisher  | 1:200         |
| Alexa Fluor 555<br>(anti-Mouse)  | A21422      | Invitrogen by ThermoFischer | 1:300         |

**Table S1.** List of primary and secondary antibodies used in the study in correspondence with their dilutions used.

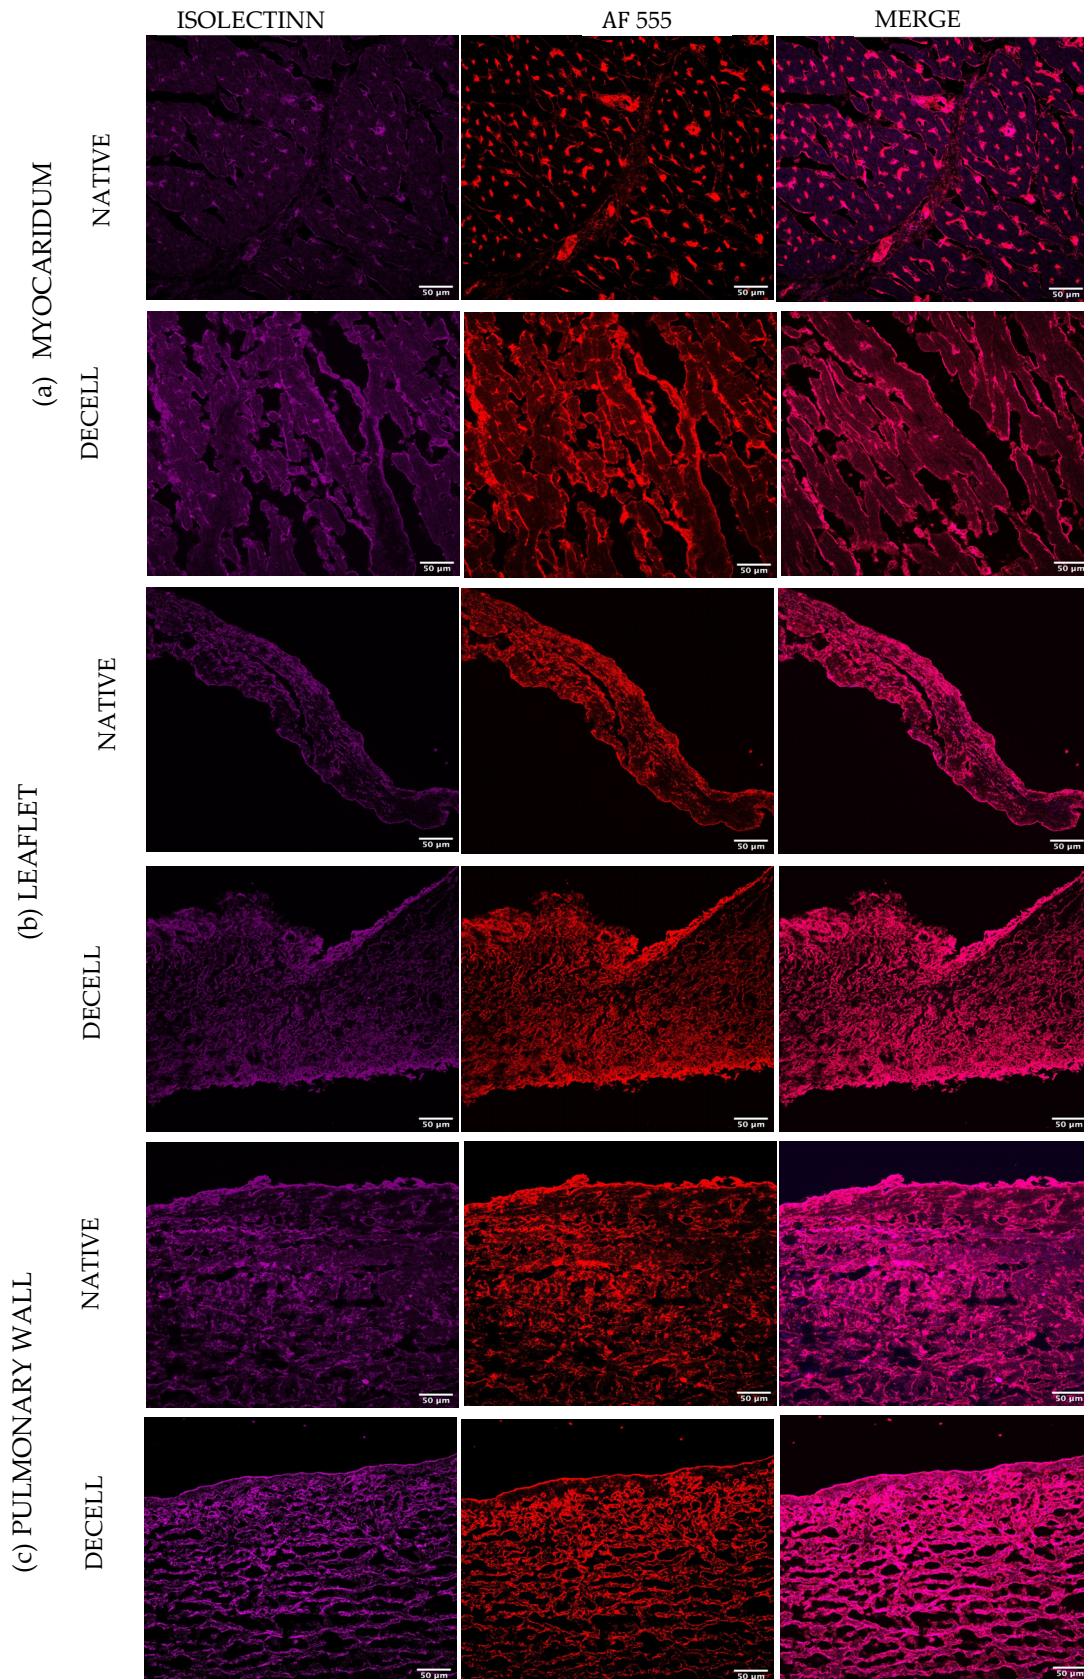

**Figure S1.** Alpha gal detection with isolectin and anti- alpha gal antibody in native and decellularized a) myocardium, b ) leaflet and c) pulmonary wall. Confocal imaging was performed using microscope Zeiss Axio Observer LSM 800 at 20x magnification. Images were processed with Fiji software. Alpha gal signal was reduced but not removed in decellularized pulmonary tissues.

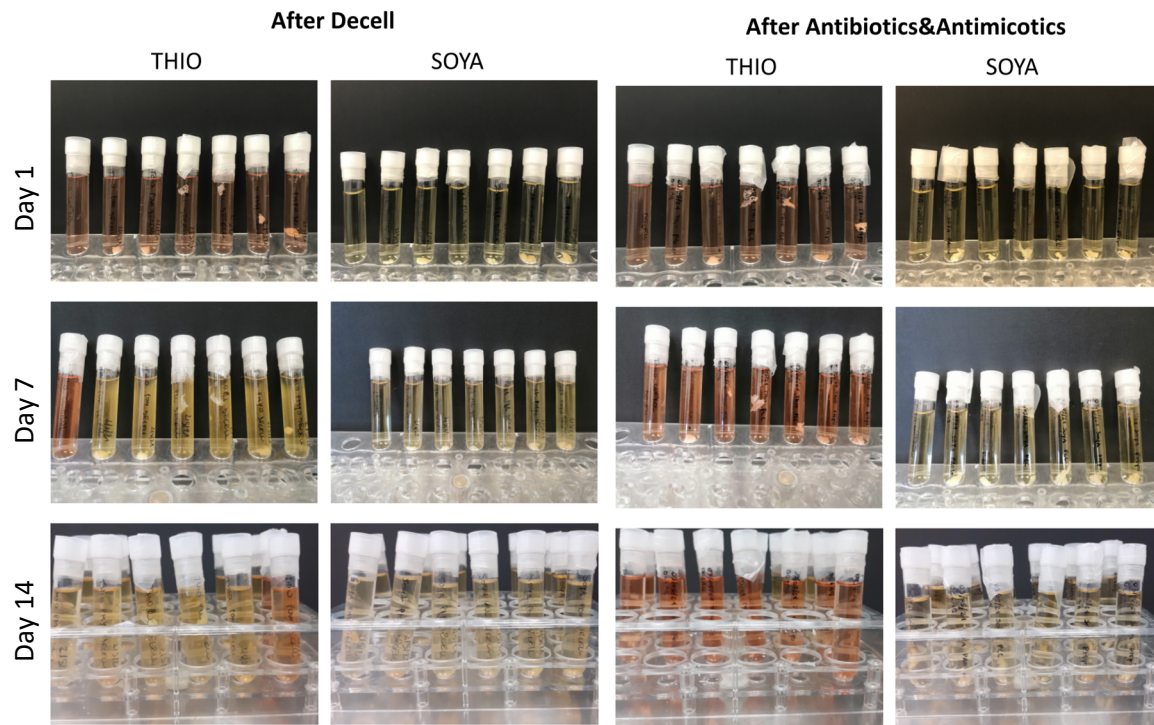

**Figure S2.** Sterility assessment of native and decellularized plus decontaminated (with Antibiotic and Antimycotic solution) samples from day 0 to day 14.
